# Supplementary material for: A Novel Gene Signature to Predict Survival Time and Incident Ventricular Arrhythmias in Patients with Dilated Cardiomyopathy
Source: Dis Markers. 2020 Sep 15;2020:8847635. doi: 10.1155/2020/8847635 (PMC7512094; doi:10.1155/2020/8847635)
Supplement: Supplementary 1 — Supplementary Table 1: summary of the basic information of DCM patients included in the study. [file 8847635.f1.xlsx]

## Sheet: Sheet1
Supplementary Table 1. Summary of the basic information of DCM patients included in the study																									Supplementary Table 1. Summary of the basic information of DCM patients included in the study
Sample ID	Seq ID	Diagnosis	Sex	Age	NYHA	Comorbidities					Ultrasonic cardiogram				Medication									Diagnosis	Sample ID	Arrhythmia history				RNA condition		Fibrosis percentage and survival data
						MI/CAD	Valve disease	DM	Smoking history	PH	LVEF (%)	LA (mm)	IVS-thickness (mm)	LVEDD (mm)	ASA	Statin	Amio	Mexil	β-Block	Digoxin	ACEI/ARB	CCB	Diuretic			Atrial		Ventricular	IVCB	Total amount(μg)	RIN	Percentage (%)	From symptom to HTx (months)	From heart failure to HTx (months)
SFW-D-1	S7	DCM	F	19	Ⅲ	N	MR	N	N	N	29	38	7	7					√	√	√		√	DCM	SFW-D-1	AF		VPC,VT		38.25	8	0.193	8	6
SFW-D-2	S8	DCM	M	28	Ⅳ	N	MR,TR	N	N	N	33	46	9	74			√		√	√	√		√	DCM	SFW-D-2			VF		28.28	7.8	0.384569	24	24
SFW-D-3	S9	DCM	M	37	Ⅳ	N	MR	N	Y	N	60			39						√	√	√	√	DCM	SFW-D-3	AF				17.5	6.9	0.253093	86	60
SFW-D-4	S10	DCM	F	55	Ⅳ	N	AR,MR	Y	N	N	15	38	7	69			√							DCM	SFW-D-4			VPC		13.69	7.9	0.751353	132	48
SFW-D-5	S11	DCM	M	46	Ⅳ	N	MR	N	N	N	25	49	7	80						√	√	√	√	DCM	SFW-D-5					15.23	8.3	0.0983468	168	168
SFW-D-6	S12	DCM	M	15	Ⅲ	N	MR,TR	N	N	N	25	43	7	62	√				√	√	√		√	DCM	SFW-D-6					19.32	8	0.0340037	60	60
SFW-D-7	S13	DCM	M	60	Ⅳ	N	MR,TR	N	N	Y	20	44	10	82					√	√	√		√	DCM	SFW-D-7					17.26	7.5	0.0317359	156	60
SFW-D-8	S14	DCM	M	41	Ⅳ	N	MR	Y	Y	N	25	53	9	78					√	√	√		√	DCM	SFW-D-8					44.45	7.8	0.177694	96	96
SFW-D-9	S15	DCM	F	56	Ⅳ	N	MR,TR	N	N	N	33	48	8	65					√		√		√	DCM	SFW-D-9	AF		VPC,VT		13.16	8.1	0.0565617	240	240
SFW-D-10	S16	DCM	M	50	Ⅳ	N	MR,TR	N	Y	N	34	42	8	72					√	√			√	DCM	SFW-D-10			VT,VPC	CRBBB	17.84	8.2	0.147179	96	98
SFW-D-11	S17	DCM	F	30	Ⅱ	N		N	N	Y	35	45	7	65					√		√		√	DCM	SFW-D-11					6.3	8.2	0.0546395	6	6
SFW-D-12	S19	DCM	F	13	Ⅲ	N	MR,TR	N	N	N	15	48	7	65	√				√	√			√	DCM	SFW-D-12					28.98	8.1	0.235263	8	3
SFW-D-13	S20	DCM	M	28	Ⅲ	N		N	N	N										√	√	√	√	DCM	SFW-D-13			VPC		19.61	8.3	0.381913	24	1
SFW-D-14	S21	DCM	F	19	Ⅲ	N	MR,TR	N	N	N	23	39	7	71						√	√		√	DCM	SFW-D-14					20.2	8	0.247872	192	192
SFW-D-15	S22	DCM	F	54	Ⅳ	N		N	N	N	29	46	8	72			√		√	√	√		√	DCM	SFW-D-15	AF				23.63	8.3
SFW-D-17	S24	DCM	M	13	Ⅲ	N		N	N	N	20	39	9	69					√	√	√		√	DCM	SFW-D-17					23.04	8.2	0.0235142	7	7
SFW-D-18	S25	DCM	F	21	Ⅳ	N	MR,TR	N	N	Y	22	44	9	58					√	√	√		√	DCM	SFW-D-18				√	14.69	7.9	0.407514	120	23
SFW-D-19	S26	DCM	M	15	Ⅱ	N	MR,TR	N	N	N	25	43	9	75										DCM	SFW-D-19					15.34	8.3	0.0383775	1	1
